# Supplementary material
Source: MDPI journal article supplement (https://www.mdpi.com/2073-4433/12/11/1467)
Supplement: s1 [file s1]

# Supplementary Materials: Characteristics and Potential Inhalation Exposure Risks of Environmentally Persistent Free Radicals in Atmospheric Particulate Matter and Solid Fuel Combustion Particles in High Lung Cancer Incidence Area, China

Kai Xiao <sup>1</sup>, Yichun Lin <sup>1</sup>, Qingyue Wang <sup>1,\*</sup>, Senlin Lu <sup>2,\*</sup>, Weiqian Wang <sup>1</sup>, Tanzin Chowdhury <sup>1</sup>, Christian Ebere Enyoh <sup>1</sup> and Mominul Haque Rabin <sup>1</sup>

<sup>1</sup> Graduate School of Science and Engineering, Saitama University, 255 Shimo-Okubo, Sakura-ku, Saitama 338-8570, Japan; xiao.k.662@ms.saitama-u.ac.jp (K.X.); lin.y.852@ms.saitama-u.ac.jp (Y.L.); weiqian@mail.saitama-u.ac.jp (W.W.); risha.chowdhury.bau@gmail.com (T.C.); cenyoh@gmail.com (E.C.E.); rabin.m.h.518@ms.saitama-u.ac.jp (M.H.R.)

<sup>2</sup> School of Environmental and Chemical Engineering, Shanghai University, 99 Shangdalu, Baoshan District, Shanghai 200-444, China

\* Correspondence: seiyo@mail.saitama-u.ac.jp (Q.W.); senlinlv@staff.shu.edu.cn (S.L.)

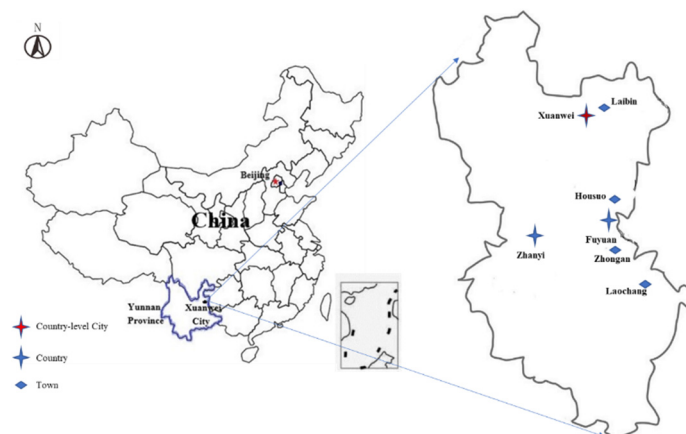

**Figure S1.** Sampling sites [28].

In this study, we collected a total of 3 types of samples: three kinds of raw biomass (Pine, Corn cob, Poplar) from Zhongan Town, six kinds of residential raw coal from Bole Town (Luomu coal (LM) and Bole coal (BL)), Houshou Town (Lijiawu coal (LJW)), Laochang Town (Shunfa coal (SF)), Laibin Town (Guangming coal (GM) and Zongfan coal (ZF)), and eight group of APMs (Houshou Town) were collected.

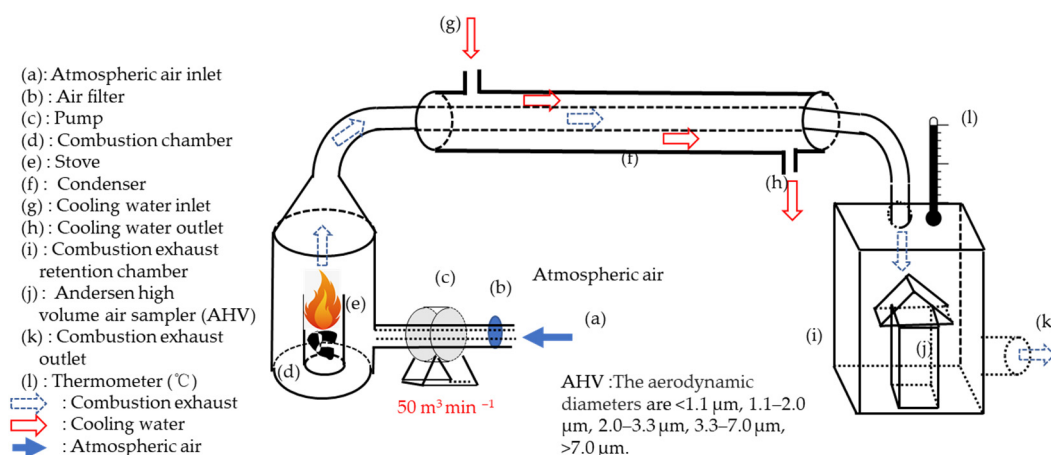

**Figure S2.** Sketch of sampling system [28].

The details information on simulated combustion systems and processes was presented in the Figure S2 from my previous study[28]. The flue gas collection system consists of a flue device and sampler. The flue device consists of a closed trumpet-shaped hood, two elbows and a cooling water sleeve. In addition, a closed flue gas holding chamber is connected to the end of the flue, and Andersen high volume air sampler (Shibata Science Co., Ltd., Japan) is placed in it. Several parts of the sampling system can be disassembled for easy cleaning, and they are connected by flanges. In order to avoid the pollution of the flue material to the flue gas, the entire flue device is made of stainless steel. The gasket used in the connection part is Teflon material.

Before simulating combustion, all parts of the sampling system are carefully cleaned. Move the solid fuel block ignited with alcohol to the furnace and place the coal furnace directly under the horn hood. The closed horn-shaped hood introduces clean air through the blower. In order to minimize the background pollution during sampling, it is convenient for experimental analysis. The flue gas is fully mixed by the flue device through the function of the sampler's pump and blower, and the temperature is reduced at the cooling water jacket. Finally, the flue gas temperature at the sampler is controlled at about 40 °C. During the experiment, ensure that there is no flue gas leakage during the entire coal combustion process, and there is no obvious particle deposition in the pipeline.

Pre-treatment of filters has been consistent in our previous studies [9]. Before and after each sampling, the filters were weighed by using an electronic balance with a detection limit of 0.01 mg (Sartorius, Co., Ltd., Germany). The Andersen sampler is placed horizontally in the flue gas holding chamber. The particles in five sizes were collected, with a flow rate at 566 L/min, and the aerodynamic diameter are <1.1 µm, 1.1–2.0 µm, 2.0–3.3 µm, 3.3–7.0 µm, and >7.0 µm, respectively.

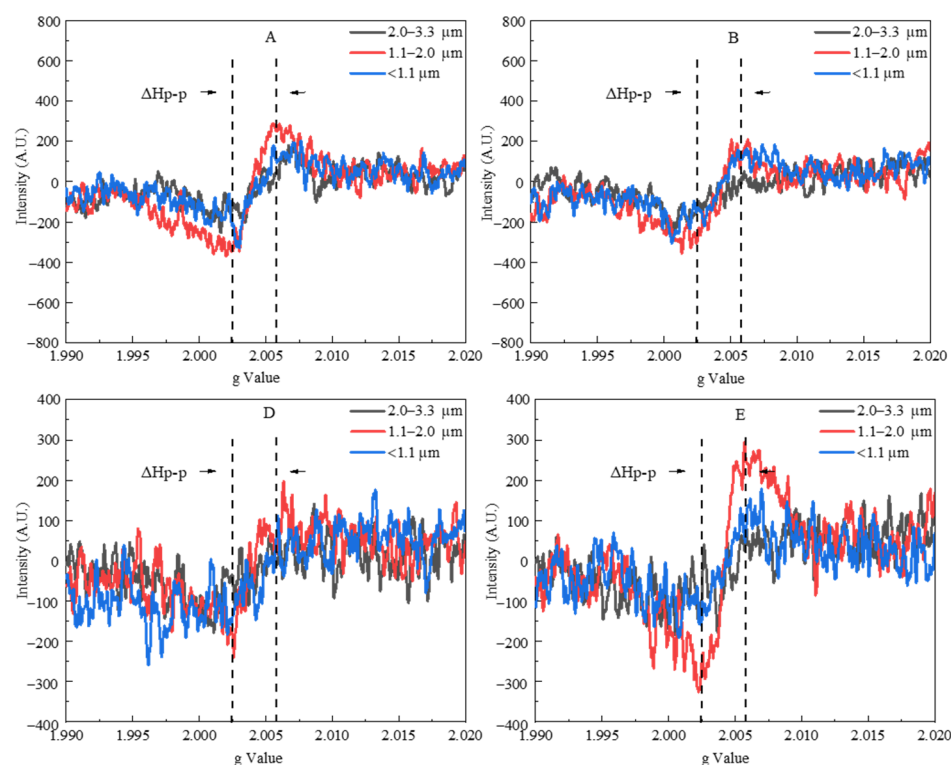**Figure S3.** The EPR spectra of EPFRs in APMs particulate matters.

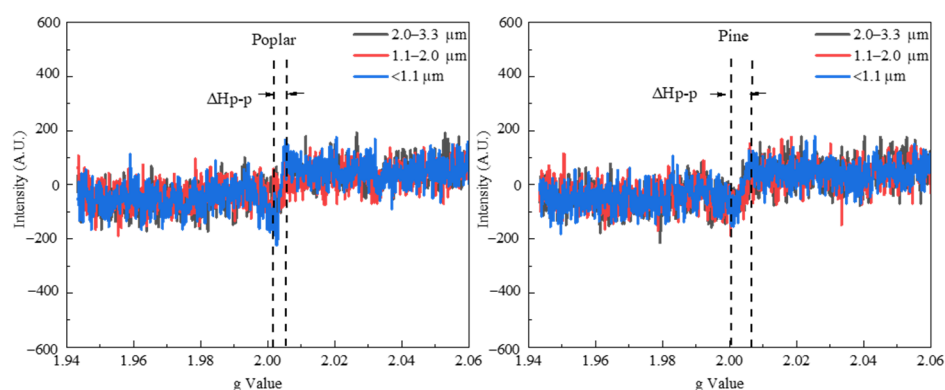

**Figure S4.** The EPR spectra of EPFRs in biomass burning particulate matters.

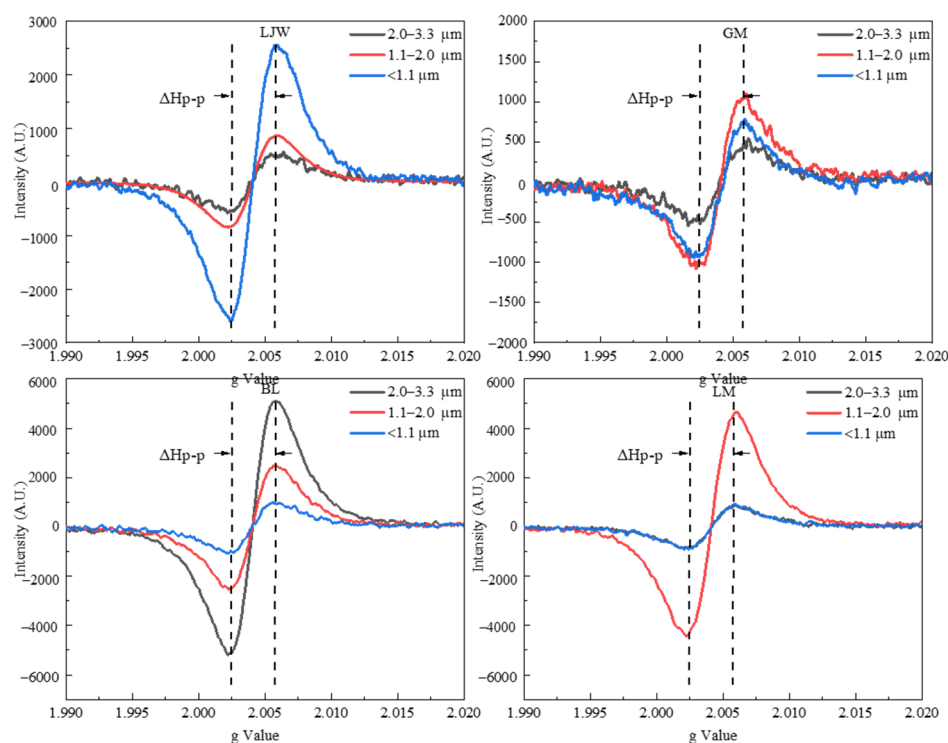

**Figure S5.** The EPR spectra of EPFRs in coal burning particulate matters.

**Table S1.** Records of atmospheric particulate matter collected in Yunnan residential areas in 2017.

| Num. | Start                | End                   | Durati<br>on h | Volume<br>L/min | Weather           | Tempera<br>ture | AQI | PM <sub>2.5</sub> | PM <sub>10</sub> |
|------|----------------------|-----------------------|----------------|-----------------|-------------------|-----------------|-----|-------------------|------------------|
| A    | 2017.2.18<br>AM9: 40 | 2017.2.20AM9:4<br>0   | 48             | 566             | 2.18 Sunny        | 9–17°C          | 67  | 42                | 66               |
|      |                      |                       |                |                 | 2.19 Sunny        | 9–22°C          | 85  | 29                | 50               |
|      |                      |                       |                |                 | 2.20 Cloudy-Sunny | 9–21°C          | 44  | 26                | 44               |
| B    | 2017.2.20A<br>M10:20 | 2017.2.22AM11:<br>20  | 48             | 566             | 2.20 Cloudy-Sunny | 9–21°C          | 44  | 26                | 44               |
|      |                      |                       |                |                 | 2.21Cloudy-Sunny  | 8–20°C          | 59  | 33                | 68               |
|      |                      |                       |                |                 | 2.22 Cloudy       | 9–20°C          | 62  | 25                | 73               |
| C    | 2017.2.22A<br>M11:30 | 2017.2.24AM11<br>: 30 | 48             | 566             | 2.22 Cloudy       | 9–20°C          | 62  | 25                | 73               |
|      |                      |                       |                |                 | 2.23 Light rain   | 8–19°C          | 40  | 26                | 35               |
|      |                      |                       |                |                 | 2.24 Light rain   | 3–6°C           | 38  | 26                | 38               |
| D    | 2017.2.24A<br>M11:50 | 2017.2.25AM11:<br>50  | 48             | 566             | 2.24 Light rain   | 3–6°C           | 38  | 26                | 38               |
|      |                      |                       |                |                 | 2.25 Light rain   | –1–2°C          | 50  | 30                | 50               |
| E    |                      | 2017.2.27PM1:40       | 48             | 566             | 2.25 Light rain   | –1–2°C          | 50  | 30                | 50               |

|   |                     |                |    |     |                             |         |     |    |     |
|---|---------------------|----------------|----|-----|-----------------------------|---------|-----|----|-----|
|   | 2017.2.25P<br>M1:40 |                |    |     | 2.26 Light rain             | 0–2 °C  | 72  | 52 | 81  |
| F | 2017.2.27P<br>M2:20 | 2017.3.1PM2:20 | 43 | 566 | 2.27 Light rain             | 3–8 °C  | 58  | 38 | 63  |
|   |                     |                |    |     | 2.28 Light rain             | 3–14 °C | 73  | 53 | 84  |
|   |                     |                |    |     | 3.1 Light rain              | 1–8 °C  | 49  | 34 | 47  |
| G | 2017.3.2PM<br>1:10  | 2017.3.3PM1:15 | 24 | 566 | 3.2 Light rain to<br>cloudy | 3–14 °C | 127 | 64 | 204 |
|   |                     |                |    |     | 3.3 Sunny–Cloudy            | 8–19 °C | 82  | 60 | 101 |
| H | 2017.3.3PM<br>5: 30 | 2017.3.4PM5:30 | 24 | 566 | 3.3 Sunny–Cloudy            | 8–19 °C | 82  | 60 | 101 |
|   |                     |                |    |     | 3.4 Cloudy                  | 8–19 °C | 78  | 45 | 105 |

Table S2. EPFRs and PM concentrations in biomass combustion particles.

| Samples  | 1.1 µm                |                       |                   | 1.1–2.0 µm            |                       |                   | 2.0–3.3 µm            |                       |                   |
|----------|-----------------------|-----------------------|-------------------|-----------------------|-----------------------|-------------------|-----------------------|-----------------------|-------------------|
|          | Spins/m <sup>3</sup>  | Spins/g               | µg/m <sup>3</sup> | Spins/m <sup>3</sup>  | Spins/g               | µg/m <sup>3</sup> | Spins/m <sup>3</sup>  | Spins/g               | µg/m <sup>3</sup> |
| Corn cob | $4.51 \times 10^{17}$ | $3.11 \times 10^{15}$ | 1781.82           | $1.04 \times 10^{17}$ | $1.30 \times 10^{15}$ | 985.86            | $6.19 \times 10^{16}$ | $9.28 \times 10^{14}$ | 820.20            |
| Pine     | $4.27 \times 10^{17}$ | $3.37 \times 10^{15}$ | 2088.89           | $4.22 \times 10^{16}$ | $8.29 \times 10^{14}$ | 840.40            | $5.09 \times 10^{16}$ | $1.29 \times 10^{15}$ | 648.48            |
| Poplar   | $3.26 \times 10^{17}$ | $1.08 \times 10^{15}$ | 4975.61           | $7.13 \times 10^{16}$ | $4.86 \times 10^{14}$ | 2420.05           | $4.59 \times 10^{16}$ | $4.22 \times 10^{14}$ | 1794.04           |
| Average  | $4.01 \times 10^{17}$ | $2.52 \times 10^{15}$ | 2948.77           | $7.25 \times 10^{16}$ | $8.72 \times 10^{14}$ | 1415.44           | $5.29 \times 10^{16}$ | $8.80 \times 10^{14}$ | 1087.57           |
| Min      | $3.26 \times 10^{17}$ | $1.08 \times 10^{15}$ | 1781.82           | $4.22 \times 10^{16}$ | $4.86 \times 10^{14}$ | 840.40            | $4.59 \times 10^{16}$ | $4.22 \times 10^{14}$ | 648.48            |
| Max      | $4.51 \times 10^{17}$ | $3.37 \times 10^{15}$ | 4975.61           | $1.04 \times 10^{17}$ | $1.30 \times 10^{15}$ | 2420.05           | $6.19 \times 10^{16}$ | $1.29 \times 10^{15}$ | 1794.04           |
| STD      | $5.42 \times 10^{16}$ | $1.02 \times 10^{15}$ | 1438.66           | $2.52 \times 10^{16}$ | $3.34 \times 10^{14}$ | 712.85            | $6.68 \times 10^{15}$ | $3.56 \times 10^{14}$ | 504.44            |

Min: Minimum value, Max: Maximum value, STD: Standard Deviation

Table S3. EPFRs and PM concentrations in coal combustion particles.

| Samples | 1.1 µm                |                       |                   | 1.1–2.0 µm            |                       |                   | 2.0–3.3 µm            |                       |                   |
|---------|-----------------------|-----------------------|-------------------|-----------------------|-----------------------|-------------------|-----------------------|-----------------------|-------------------|
|         | Spins/m <sup>3</sup>  | Spins/g               | µg/m <sup>3</sup> | Spins/m <sup>3</sup>  | Spins/g               | µg/m <sup>3</sup> | Spins/m <sup>3</sup>  | Spins/g               | µg/m <sup>3</sup> |
| BL      | $2.10 \times 10^{17}$ | $6.51 \times 10^{15}$ | 2193.76           | $5.06 \times 10^{16}$ | $2.36 \times 10^{15}$ | 1457.60           | $1.01 \times 10^{17}$ | $3.73 \times 10^{15}$ | 1833.04           |
| LM      | $1.87 \times 10^{17}$ | $2.93 \times 10^{15}$ | 4340.40           | $8.26 \times 10^{16}$ | $1.60 \times 10^{15}$ | 3514.43           | $2.40 \times 10^{16}$ | $1.10 \times 10^{15}$ | 1487.04           |
| SF      | $2.25 \times 10^{17}$ | $2.32 \times 10^{15}$ | 6606.30           | $1.95 \times 10^{16}$ | $3.58 \times 10^{14}$ | 3697.00           | $3.07 \times 10^{16}$ | $1.46 \times 10^{15}$ | 1432.57           |
| LJW     | $3.36 \times 10^{17}$ | $3.64 \times 10^{15}$ | 6277.97           | $1.51 \times 10^{16}$ | $1.84 \times 10^{14}$ | 5555.06           | $2.29 \times 10^{16}$ | $6.22 \times 10^{14}$ | 2497.06           |
| GM      | $1.88 \times 10^{17}$ | $1.27 \times 10^{16}$ | 1008.54           | $2.57 \times 10^{16}$ | $2.18 \times 10^{15}$ | 802.41            | $2.48 \times 10^{16}$ | $2.92 \times 10^{15}$ | 577.15            |
| ZF      | $1.51 \times 10^{17}$ | $4.25 \times 10^{15}$ | 2410.19           | $2.88 \times 10^{16}$ | $1.10 \times 10^{15}$ | 1775.62           | $1.69 \times 10^{16}$ | $1.91 \times 10^{15}$ | 600.71            |
| Average | $2.16 \times 10^{16}$ | $5.39 \times 10^{15}$ | 3806.19           | $3.70 \times 10^{16}$ | $1.30 \times 10^{15}$ | 2800.35           | $3.67 \times 10^{16}$ | $1.96 \times 10^{15}$ | 1404.60           |
| Min     | $1.51 \times 10^{17}$ | $2.32 \times 10^{15}$ | 1008.54           | $1.51 \times 10^{16}$ | $1.84 \times 10^{14}$ | 802.41            | $1.69 \times 10^{16}$ | $6.22 \times 10^{14}$ | 577.15            |
| Max     | $3.36 \times 10^{17}$ | $1.27 \times 10^{16}$ | 6606.30           | $8.26 \times 10^{16}$ | $2.36 \times 10^{15}$ | 5555.06           | $1.10 \times 10^{17}$ | $3.73 \times 10^{15}$ | 2497.06           |
| STD     | $5.82 \times 10^{17}$ | $3.52 \times 10^{15}$ | 2105.99           | $2.33 \times 10^{16}$ | $8.31 \times 10^{14}$ | 1620.04           | $2.89 \times 10^{16}$ | $1.07 \times 10^{15}$ | 672.75            |

Min: Minimum value, Max: Maximum value, STD: Standard Deviation

Table S4. EPFRs and PM concentrations in atmospheric particulate matters.

| Samples | 1.1 µm                |                       |                   | 1.1–2.0 µm            |                       |                   | 2.0–3.3 µm            |                       |                   |
|---------|-----------------------|-----------------------|-------------------|-----------------------|-----------------------|-------------------|-----------------------|-----------------------|-------------------|
|         | Spins/m <sup>3</sup>  | Spins/g               | µg/m <sup>3</sup> | Spins/m <sup>3</sup>  | Spins/g               | µg/m <sup>3</sup> | Spins/m <sup>3</sup>  | Spins/g               | µg/m <sup>3</sup> |
| A       | $8.50 \times 10^{15}$ | $2.23 \times 10^{17}$ | 62.08             | $1.24 \times 10^{15}$ | $8.72 \times 10^{16}$ | 23.25             | $1.34 \times 10^{15}$ | $1.10 \times 10^{17}$ | 19.94             |
| B       | $6.61 \times 10^{15}$ | $1.55 \times 10^{17}$ | 69.69             | $8.71 \times 10^{14}$ | $5.90 \times 10^{16}$ | 24.06             | $7.08 \times 10^{14}$ | $4.88 \times 10^{16}$ | 23.62             |
| C       | $3.14 \times 10^{15}$ | $1.63 \times 10^{17}$ | 31.41             | $4.95 \times 10^{14}$ | $5.16 \times 10^{16}$ | 20.8              | $4.95 \times 10^{14}$ | $5.16 \times 10^{16}$ | 15.64             |
| D       | $1.79 \times 10^{16}$ | $4.26 \times 10^{17}$ | 34.23             | $1.16 \times 10^{14}$ | $4.17 \times 10^{16}$ | 22.82             | $1.16 \times 10^{15}$ | $4.17 \times 10^{16}$ | 22.58             |
| E       | $2.86 \times 10^{15}$ | $1.44 \times 10^{17}$ | 32.39             | $7.39 \times 10^{14}$ | $3.21 \times 10^{16}$ | 37.48             | $6.99 \times 10^{14}$ | $5.19 \times 10^{16}$ | 21.96             |
| F       | $3.17 \times 10^{15}$ | $1.86 \times 10^{17}$ | 27.73             | $9.24 \times 10^{14}$ | $5.09 \times 10^{16}$ | 29.57             | $6.07 \times 10^{14}$ | $5.27 \times 10^{16}$ | 18.77             |
| Average | $7.03 \times 10^{15}$ | $2.16 \times 10^{17}$ | 42.92             | $9.05 \times 10^{14}$ | $5.38 \times 10^{16}$ | 26.33             | $8.35 \times 10^{14}$ | $5.95 \times 10^{16}$ | 20.42             |

|     |                       |                       |       |                       |                       |       |                       |                       |       |
|-----|-----------------------|-----------------------|-------|-----------------------|-----------------------|-------|-----------------------|-----------------------|-------|
| Min | $2.86 \times 10^{15}$ | $1.44 \times 10^{17}$ | 27.73 | $4.95 \times 10^{14}$ | $3.21 \times 10^{16}$ | 20.80 | $4.95 \times 10^{14}$ | $4.17 \times 10^{16}$ | 15.64 |
| Max | $1.79 \times 10^{16}$ | $4.26 \times 10^{17}$ | 69.69 | $1.24 \times 10^{15}$ | $8.72 \times 10^{16}$ | 37.48 | $1.34 \times 10^{15}$ | $1.10 \times 10^{17}$ | 23.62 |
| STD | $5.29 \times 10^{15}$ | $9.73 \times 10^{16}$ | 16.50 | $2.50 \times 10^{14}$ | $1.72 \times 10^{16}$ | 5.66  | $3.06 \times 10^{14}$ | $2.29 \times 10^{16}$ | 2.68  |

Min: Minimum value, Max: Maximum value, STD: Standard Deviation

**Table S5.** g-values and  $\Delta H_{p-p}$  of the EPFRs produced by different PM from Xuanwei.

| Sample type | Sample groups | <1.1 $\mu\text{m}$ |                          | 1.1–2.0 $\mu\text{m}$ |                          | 2.0–3.3 $\mu\text{m}$ |                          |
|-------------|---------------|--------------------|--------------------------|-----------------------|--------------------------|-----------------------|--------------------------|
|             |               | g-factors          | $\Delta H_{p-p}$ (Gauss) | g-factors             | $\Delta H_{p-p}$ (Gauss) | g-factors             | $\Delta H_{p-p}$ (Gauss) |
| Coal        | BL            | 2.0041             | 5.6404                   | 2.0039                | 5.6647                   | 2.0039                | 5.8357                   |
|             | LM            | 2.0041             | 5.5670                   | 2.0039                | 5.4205                   | 2.0039                | 5.5670                   |
|             | SF            | 2.0041             | 6.2996                   | 2.0039                | 6.5193                   | 2.0040                | 5.9333                   |
|             | LJW           | 2.0038             | 5.4694                   | 2.0039                | 5.9089                   | 2.0039                | 5.9333                   |
|             | GM            | 2.0041             | 6.5193                   | 2.0043                | 6.2996                   | 2.0041                | 6.5682                   |
|             | ZF            | 2.0041             | 5.6648                   | 2.0016                | 5.5182                   | 2.0041                | 5.2741                   |
|             | Average       | 2.0040             | 5.8601                   | 2.0036                | 5.8885                   | 2.0040                | 5.8519                   |
|             | STD           | 0.0001             | 0.3985                   | 0.0009                | 0.4028                   | 0.0001                | 0.3962                   |
| Biomass     | Poplar        | 2.0042             | 3.8335                   | 2.0043                | 2.2219                   | 2.0042                | 6.1043                   |
|             | Pine          | 2.0039             | 8.4239                   | 2.0040                | 4.8590                   | 2.0039                | 8.6680                   |
|             | Corn cob      | 2.0039             | 6.0554                   | 2.0041                | 4.2730                   | 2.0039                | 6.0798                   |
|             | Average       | 2.0040             | 6.1043                   | 2.0041                | 3.7846                   | 2.0040                | 6.9507                   |
|             | STD           | 0.0001             | 1.8743                   | 0.0001                | 1.1306                   | 0.0001                | 1.2144                   |
| APMs        | A             | 2.0046             | 6.8612                   | 2.0048                | 4.6148                   | 2.0046                | 9.0098                   |
|             | B             | 2.0044             | 8.1064                   | 2.0041                | 6.0554                   | 2.0044                | 9.3517                   |
|             | C             | 2.0039             | 4.8834                   | 2.0043                | 5.3474                   | 2.0041                | 1.7581                   |
|             | D             | 2.0039             | 16.0420                  | 2.0039                | 6.7635                   | 2.0039                | 9.3029                   |
|             | E             | 2.0042             | 11.0853                  | 2.0042                | 6.1042                   | 2.0044                | 9.4738                   |
|             | F             | 2.0042             | 5.5915                   | 2.0044                | 4.9811                   | 2.0042                | 3.4672                   |
|             | Average       | 2.0042             | 8.7616                   | 2.0043                | 5.6444                   | 2.0043                | 7.0606                   |
|             | STD           | 0.0002             | 3.8196                   | 0.0003                | 0.7327                   | 0.0002                | 3.1867                   |

STD: Standard Deviation

**Table S6.** The potential health risk of EPFRs for adults and child per year.

| Sample type | Sample groups | <1.1 $\mu\text{m}$ |           | 1.1–2.0 $\mu\text{m}$ |           | 2.0–3.3 $\mu\text{m}$ |           | 3.3 $\mu\text{m}$ |           |
|-------------|---------------|--------------------|-----------|-----------------------|-----------|-----------------------|-----------|-------------------|-----------|
|             |               | EQ(Adult)          | EQ(child) | EQ(Adult)             | EQ(child) | EQ(Adult)             | EQ(child) | EQ(Adult)         | EQ(child) |
| Coal        | BL            | 126.57             | 48.10     | 30.48                 | 11.58     | 60.62                 | 23.04     | 217.68            | 82.72     |
|             | LM            | 112.90             | 42.90     | 49.75                 | 18.91     | 14.48                 | 5.50      | 177.13            | 67.31     |
|             | SF            | 135.69             | 51.56     | 135.69                | 51.56     | 18.51                 | 7.03      | 165.94            | 63.06     |
|             | LJW           | 202.37             | 76.90     | 9.07                  | 3.45      | 13.78                 | 5.24      | 225.21            | 85.58     |
|             | GM            | 113.39             | 43.09     | 15.47                 | 5.88      | 14.94                 | 5.68      | 143.80            | 54.64     |
|             | ZF            | 90.91              | 34.55     | 17.35                 | 6.59      | 10.18                 | 3.87      | 118.44            | 45.01     |
|             | Average       | 130.31             | 49.52     | 42.97                 | 16.33     | 22.09                 | 8.39      | 174.70            | 66.39     |
|             | Min           | 90.91              | 34.55     | 9.07                  | 3.45      | 10.18                 | 3.87      | 118.44            | 45.01     |
|             | Max           | 202.37             | 76.90     | 135.69                | 51.56     | 60.62                 | 23.04     | 225.21            | 85.58     |
|             | STD           | 35.06              | 13.32     | 43.51                 | 16.54     | 17.40                 | 6.61      | 37.86             | 14.39     |
| Biomass     | Poplar        | 49.15              | 18.68     | 11.37                 | 4.32      | 6.75                  | 2.57      | 67.27             | 25.56     |

|      |         |        |       |       |       |       |      |        |       |
|------|---------|--------|-------|-------|-------|-------|------|--------|-------|
|      | Pine    | 62.48  | 23.74 | 6.18  | 2.35  | 7.44  | 2.83 | 76.10  | 28.92 |
|      | Corncob | 47.71  | 18.13 | 10.44 | 3.97  | 6.71  | 2.55 | 64.86  | 24.65 |
|      | Average | 53.11  | 20.18 | 9.33  | 3.54  | 6.97  | 2.65 | 69.41  | 26.37 |
|      | Min     | 47.71  | 18.13 | 6.18  | 2.35  | 6.71  | 2.55 | 64.86  | 24.65 |
|      | Max     | 62.48  | 23.74 | 11.37 | 4.32  | 7.44  | 2.83 | 76.10  | 28.92 |
|      | STD     | 6.65   | 2.53  | 2.26  | 0.86  | 0.34  | 0.13 | 4.83   | 1.84  |
| APMs | A       | 122.91 | 46.70 | 17.97 | 6.83  | 19.44 | 7.39 | 160.31 | 60.92 |
|      | B       | 95.56  | 36.31 | 95.56 | 36.31 | 10.23 | 3.89 | 118.38 | 44.98 |
|      | C       | 45.34  | 17.23 | 45.34 | 17.23 | 7.16  | 2.72 | 64.52  | 24.52 |
|      | D       | 129.24 | 49.11 | 6.51  | 2.47  | 8.35  | 3.17 | 144.11 | 54.76 |
|      | E       | 41.33  | 15.70 | 10.68 | 4.06  | 10.10 | 3.84 | 62.11  | 23.60 |
|      | F       | 45.76  | 17.39 | 13.35 | 5.07  | 13.35 | 5.07 | 67.88  | 25.79 |
|      | Average | 80.02  | 30.41 | 31.57 | 12.00 | 11.44 | 4.35 | 102.88 | 39.10 |
|      | Min     | 41.33  | 15.70 | 6.51  | 2.47  | 7.16  | 2.72 | 62.11  | 23.60 |
|      | Max     | 129.24 | 49.11 | 95.56 | 36.31 | 19.44 | 7.39 | 160.31 | 60.92 |
|      | STD     | 37.37  | 14.20 | 31.27 | 11.88 | 4.06  | 1.54 | 39.99  | 15.20 |

Min: Minimum value, Max: Maximum value, STD: Standard Deviation

- [9] Xiao, K.; Qin, A.; Wang, W.; Lu, S.; Wang, Q. Study on the Characteristics of Size-Segregated Particulate Water-Soluble Inorganic Ions and Potentially Toxic Metals during Wintertime in a High Population Residential Area in Beijing, China. *Processes* **2021**, *9*, 552. <https://doi.org/10.3390/pr9030552>.
- [28] Xiao, K.; Wang, Q.; Lin, Y.; Wang, W.; Lu, S.; Yonemochi, S. Approval Research for Carcinogen Humic-Like Substances (HULIS) Emitted from Residential Coal Combustion in High Lung Cancer Incidence Areas of China. *Processes* **2021**, *9*, 1254. <https://doi.org/10.3390/pr9071254>.
